# Supplementary material
Source: PubMed Central journal article supplement (PMC6756178)

## Supplemental Figure Legend

**Supplemental Figure 1.** Gene ontology enrichment analysis for protein biomarkers. Red bars are protein biomarkers with higher relative levels in women. Blue bars are protein biomarkers with higher relative levels in men. The bars indicate the log<sub>10</sub> of the FDR and all bars are statistically significant for each term.

**Supplemental Figure 2.** Heatmap of sex differences in biomarkers by menopausal and hormonal status. Heatmap displays relative sex differences in biomarker concentrations among (1) all women, (2) pre-menopausal women, (3) post-menopausal women, (4) post-menopausal women not on HRT, and (5) post-menopausal women on HRT compared with age distribution matched men. Positive  $\beta$ -coefficients (red) represent biomarkers that are higher in women and negative  $\beta$  (blue) represent biomarkers that are higher in men.

**Supplemental Table 1. Biomarker assay performance characteristics**

| Abbreviation  | Precision <sup>§</sup> |             | Accuracy <sup>¥</sup> | Linearity <sup>**</sup> | Detection <sup>£</sup> |              |
|---------------|------------------------|-------------|-----------------------|-------------------------|------------------------|--------------|
|               | Inter-CV, %            | Intra-CV, % | Spike recovery %      | % Of Origin             | LLOQ (pg/mL)           | ULOQ (pg/ml) |
| A1M           | 7.6                    | 3.9         | 100.5                 | 101.4                   | 3640                   | 71400000     |
| ADAM15        | 3.15                   | 6.1         | 100                   | 100.5                   | 39                     | 14100        |
| Adipsin       | 17.65                  | 4.7         | 101.3                 | 102.8                   | 18600                  | 7450000      |
| ADM           | 8.6                    | 5.65        | 109.1                 | 95.4                    | 11                     | 827          |
| AGP1          | 5.15                   | 8.2         | 101.1                 | 99.7                    | 29400000               | 2270000000   |
| ANGPTL3       | 4.4                    | 14.8        | 89.6                  | 113.5                   | 1380                   | 97700        |
| APOA1         | 7.2                    | 20.35       | 101.8                 | 96.9                    | 22500000               | 1590000000   |
| APOB          | 13.4                   | 4.8         | 98                    | 103.1                   | 56100000               | 3630000000   |
| B2M           | 15.85                  | 3.95        | 98.4                  | 98.1                    | 154000                 | 12000000     |
| BCHE          | 11.9                   | 8.5         | 93.7                  | 97.5                    | 949                    | 23300000     |
| BIKUNIN       | 8.05                   | 5           | 112.6                 | 100.1                   | 1918                   | 499000000    |
| NTproBNP      | 5.8                    | 11.8        | 98.3                  | 99.2                    | 9.71                   | 30100        |
| C2            | 14                     | 3.55        | 99.8                  | 101                     | 6760000                | 1090000000   |
| CD14          | 14.95                  | 3.55        | 100                   | 100.2                   | 2140000                | 63000000     |
| CD163         | 3.85                   | 6.65        | 100.2                 | 103.3                   | 5540                   | 1180000      |
| CD40L         | 4                      | 14.45       | 90.6                  | 96.6                    | 19.4                   | 2010         |
| CD5L          | 9                      | 2.7         | 99.8                  | 106.3                   | 2                      | 908000       |
| CDH13         | 3.7                    | 7.25        | 100                   | 106.4                   | 4680                   | 3420000      |
| Ceruloplasmin | 4.25                   | 7.4         | 100.4                 | 99                      | 60500000               | 4120000000   |
| CLEC3B        | 4.1                    | 7.15        | 100.2                 | 101.4                   | 630000                 | 10500000     |
| clusterin     | 14.55                  | 10.15       | 117.8                 | 116.5                   | 1.5                    | 26700        |
| CNTN1         | 5.7                    | 7.7         | 100.7                 | 98.6                    | 4500                   | 131000       |
| COL18A1       | 4.45                   | 15          | 88.6                  | 119.1                   | 2670                   | 607000       |
| CRP           | 12.2                   | 6.65        | 104.6                 | 97.6                    | 20                     | 3740         |
| CXCL16        | 3.15                   | 12.3        | 96.3                  | 93.8                    | 73.8                   | 4070         |
| Cystatin C    | 7.45                   | 3.15        | 89.3                  | 89                      | 2480                   | 2680000      |
| DPP4          | 2.4                    | 5.6         | 124.2                 | 263.4                   | 4420                   | 577000       |
| EFEMP1        | 9.4                    | 4.3         | 99.7                  | 97.8                    | 4790                   | 349000000    |
| FBN           | 8.35                   | 3.35        | 100.1                 | 104.2                   | 2740                   | 3470000000   |
| FGF23         | 5.6                    | 13.7        | 91.6                  | 101.4                   | 18.7                   | 11800        |
| GAPDH         | 16.6                   | 3.75        | 100.1                 | 92.2                    | 774                    | 521000       |
| GDF15         | 9.35                   | 5.2         | 91.5                  | 97                      | 40                     | 20600        |
| GMP140        | 13.45                  | 4.65        | 89.6                  | 79                      | 116                    | 60500        |
| GP5           | 11.35                  | 3.7         | 104.9                 | 100.4                   | 65.4                   | 94600        |
| GRN           | 5.4                    | 2.7         | 99.1                  | 102.4                   | 2820                   | 367000       |
| Hemopexin     | 4.05                   | 6.65        | 99.7                  | 101.1                   | 76100000               | 1600000000   |
| IGF1          | 5.25                   | 7.3         | 88.9                  | 105.2                   | 285                    | 422000       |
| IGFBP1        | 6.15                   | 2.5         | 99.8                  | 101.5                   | 979                    | 267000       |
| IGFBP2        | 9.45                   | 4.4         | 99.8                  | 98.8                    | 5970                   | 51100000     |
| IGFBP3        | 16.6                   | 4.15        | 101.1                 | 113                     | 272                    | 618000       |
| KLKB1         | 20.35                  | 6.7         | 98.8                  | 110.6                   | 24                     | 13900000     |
| LDLR          | 3.65                   | 6.8         | 100.1                 | 109.3                   | 7260                   | 5230000      |

|             |       |       |       |       |       |          |
|-------------|-------|-------|-------|-------|-------|----------|
| Leptin      | 6.4   | 11.4  | 97.9  | 132   | 397   | 161000   |
| Leptin-R    | 5.75  | 9.9   | 92.9  | 117.5 | 911   | 293000   |
| LPA         | 14.75 | 9     | 100   | 104.4 | 320   | 6390000  |
| MCAM        | 8.1   | 4.15  | 95.8  | 99.6  | 29    | 486000   |
| MCP1        | 4.7   | 12.4  | 94.8  | 100.9 | 5.67  | 5030     |
| MMP8        | 6.95  | 15.4  | 100.3 | 106.8 | 68    | 53700    |
| MMP9        | 9.05  | 4.3   | 81    | 74    | 243   | 974000   |
| MPO         | 11.4  | 4.1   | 88.3  | 138   | 102   | 781100   |
| Myoglobin   | 6.4   | 7.3   | 88.7  | 107.1 | 1710  | 285000   |
| NCAM        | 5.75  | 2     | 100.1 | 100.2 | 13800 | 764000   |
| Notch1      | 5.85  | 2.3   | 100   | 102   | 34    | 1480     |
| NRCAM       | 2.95  | 6.7   | 97.9  | 95.9  | 943   | 566000   |
| Osteocalcin | 5.7   | 9.75  | 90.7  | 120.1 | 492   | 28800    |
| PAI1        | 3.9   | 11.55 | 103.4 | 87.5  | 2420  | 205000   |
| PMP2        | 3.9   | 6.2   | 98.2  | 120.5 | 81    | 59400    |
| PON1        | 7.5   | 4.05  | 99.9  | 100.6 | 1190  | 149000   |
| PPBP        | 6.2   | 3.4   | 97.9  | 97.7  | 222   | 16100000 |
| REG1A       | 8.25  | 9.1   | 86.8  | 97.4  | 22600 | 980000   |
| Resistin    | 4.8   | 11.1  | 101.3 | 91.5  | 236   | 31100    |
| SAA1        | 22.65 | 11.05 | 97.5  | 100.3 | 19900 | 4960000  |
| SDF1        | 12    | 5.9   | 101   | 102.5 | 59    | 17500    |
| SERPINA10   | 6.5   | 4.05  | 100   | 112.1 | 28500 | 12000000 |
| sGP130      | 6.5   | 3     | 101.1 | 94    | 417   | 229000   |
| sICAM1      | 10.25 | 4.5   | 85.1  | 102.5 | 2020  | 128000   |
| sRAGE       | 4.8   | 14.75 | 91.9  | 97.2  | 103   | 12600    |
| TIMP1       | 10.85 | 4.85  | 86.1  | 93.1  | 273   | 93600    |
| TSC22D3     | 12.6  | 10.6  | 100.4 | 102.1 | 974   | 198900   |
| UCMGP       | 17.8  | 10.8  | 100.2 | 118.8 | 9110  | 339000   |
| VEGF        | 5.15  | 14.35 | 92.8  | 102.7 | 9.18  | 1880     |

**Supplemental Table 2. Age-adjusted and multivariable-adjusted associations of single circulating biomarkers with sex**

| Biomarker   | Age-adjusted Model    |       |            | MV-adjusted Model     |       |           |
|-------------|-----------------------|-------|------------|-----------------------|-------|-----------|
|             | $\beta$ -coefficient* | SE    | p-value    | $\beta$ -coefficient* | SE    | p-value   |
| CD56        | -0.827                | 0.022 | 4.67E-290  | -0.839                | 0.024 | 5.03E-254 |
| Myoglobin   | -0.884                | 0.020 | <1.00E-500 | -0.803                | 0.023 | 2.00E-252 |
| GMP140      | -0.445                | 0.023 | 2.53E-79   | -0.338                | 0.025 | 4.72E-39  |
| sGP130      | -0.304                | 0.023 | 1.25E-39   | -0.278                | 0.025 | 3.73E-27  |
| BCHE        | -0.428                | 0.023 | 1.63E-73   | -0.274                | 0.025 | 2.31E-27  |
| MMP8        | -0.354                | 0.023 | 1.73E-52   | -0.254                | 0.025 | 7.72E-23  |
| OSTEO       | -0.249                | 0.023 | 1.61E-25   | -0.245                | 0.026 | 1.01E-20  |
| AIM         | -0.239                | 0.022 | 1.15E-26   | -0.215                | 0.025 | 1.47E-17  |
| IGFBP2      | 0.032                 | 0.023 | 0.204      | -0.188                | 0.023 | 1.03E-15  |
| REG1A       | -0.113                | 0.023 | 1.14E-06   | -0.187                | 0.025 | 3.52E-13  |
| MCP1        | -0.268                | 0.022 | 6.63E-32   | -0.182                | 0.025 | 1.05E-12  |
| Tetranectin | -0.172                | 0.024 | 7.98E-13   | -0.173                | 0.026 | 1.63E-10  |
| CD163       | -0.265                | 0.023 | 3.88E-29   | -0.155                | 0.026 | 5.10E-09  |
| MMP9        | -0.249                | 0.024 | 2.16E-25   | -0.152                | 0.026 | 6.13E-09  |
| DPP4        | -0.101                | 0.024 | 3.65E-05   | -0.149                | 0.027 | 4.16E-08  |
| GAPDH       | -0.182                | 0.024 | 4.34E-14   | -0.146                | 0.027 | 9.98E-08  |
| MCAM        | -0.020                | 0.023 | 0.430      | -0.145                | 0.025 | 1.61E-08  |
| TIMP1       | -0.244                | 0.020 | 2.56E-32   | -0.130                | 0.022 | 1.48E-08  |
| PMP2        | -0.130                | 0.024 | 9.74E-08   | -0.112                | 0.027 | 5.03E-05  |
| ADAM15      | -0.114                | 0.024 | 2.95E-06   | -0.105                | 0.027 | 0.0001    |
| PAI1        | -0.360                | 0.023 | 3.03E-54   | -0.103                | 0.023 | 1.04E-05  |
| Cystatin C  | -0.231                | 0.021 | 3.74E-28   | -0.099                | 0.023 | 2.28E-05  |
| COL18A1     | -0.180                | 0.023 | 8.95E-15   | -0.094                | 0.026 | 0.0004    |
| Adipsin     | -0.205                | 0.022 | 5.78E-21   | -0.064                | 0.023 | 0.008     |
| NRCAM       | -0.064                | 0.024 | 0.009      | -0.053                | 0.027 | 0.065     |
| ApoB        | -0.385                | 0.023 | 5.85E-60   | -0.028                | 0.017 | 0.122     |
| LDLR        | -0.062                | 0.024 | 0.012      | -0.028                | 0.027 | 0.359     |
| CDH13       | -0.050                | 0.024 | 0.045      | -0.025                | 0.027 | 0.406     |
| VEGF        | -0.076                | 0.023 | 0.002      | -0.025                | 0.026 | 0.406     |

|           |          |       |           |        |       |          |
|-----------|----------|-------|-----------|--------|-------|----------|
| GDF15     | -0.045   | 0.017 | 0.012     | -0.003 | 0.019 | 0.880    |
| PON1      | 0.174    | 0.023 | 1.09E-13  | 0.011  | 0.025 | 0.698    |
| TSC22D3   | 0.008    | 0.024 | 0.758     | 0.015  | 0.027 | 0.616    |
| Leptin R  | 0.084    | 0.023 | 0.0005    | 0.025  | 0.026 | 0.406    |
| Notch1    | -0.075   | 0.024 | 0.002     | 0.045  | 0.026 | 0.114    |
| sICAM1    | -0.097   | 0.023 | 4.90E-05  | 0.058  | 0.025 | 0.030    |
| CD40L     | 0.034    | 0.024 | 0.186     | 0.082  | 0.026 | 0.003    |
| LPA       | 0.077    | 0.024 | 0.002     | 0.085  | 0.027 | 0.002    |
| ANGPTL3   | -0.188   | 0.023 | 1.01E-15  | 0.096  | 0.023 | 4.97E-05 |
| PPBP      | 0.090    | 0.024 | 0.0003    | 0.110  | 0.027 | 6.12E-05 |
| UCMGP     | -0.008   | 0.021 | 0.737     | 0.118  | 0.023 | 3.78E-07 |
| B2M       | -0.064   | 0.021 | 0.003     | 0.119  | 0.023 | 4.17E-07 |
| AGP1      | -0.119   | 0.024 | 8.73E-07  | 0.120  | 0.025 | 1.95E-06 |
| Pzi       | 0.072    | 0.024 | 0.003     | 0.135  | 0.027 | 6.57E-07 |
| APOA1     | 0.637    | 0.022 | 3.99E-167 | 0.151  | 0.021 | 1.68E-12 |
| SDF1      | 0.208    | 0.024 | 4.93E-18  | 0.165  | 0.027 | 1.29E-09 |
| CD5L      | 4.90E-05 | 0.023 | 0.998     | 0.182  | 0.026 | 3.05E-12 |
| MPO       | 0.030    | 0.024 | 0.247     | 0.188  | 0.026 | 1.52E-12 |
| BIKUNIN   | 0.170    | 0.024 | 1.25E-12  | 0.192  | 0.026 | 1.20E-12 |
| GRN       | 0.143    | 0.024 | 2.50E-09  | 0.212  | 0.026 | 2.82E-15 |
| Clusterin | 0.197    | 0.024 | 3.04E-16  | 0.216  | 0.027 | 1.50E-15 |
| IGFBP3    | 0.213    | 0.023 | 2.54E-19  | 0.235  | 0.026 | 1.28E-18 |
| GP5       | 0.246    | 0.024 | 1.09E-24  | 0.235  | 0.027 | 2.98E-18 |
| CXCL16    | 0.234    | 0.023 | 1.86E-23  | 0.266  | 0.026 | 2.02E-24 |
| SRAGE     | 0.320    | 0.023 | 2.34E-41  | 0.281  | 0.026 | 3.73E-27 |
| CD14      | 0.290    | 0.023 | 4.57E-35  | 0.291  | 0.026 | 1.30E-28 |
| SAA1      | 0.186    | 0.023 | 1.18E-15  | 0.314  | 0.024 | 8.46E-37 |
| FBN       | 0.159    | 0.022 | 2.82E-12  | 0.328  | 0.024 | 1.97E-40 |
| FGF23     | 0.279    | 0.024 | 1.66E-31  | 0.353  | 0.027 | 2.29E-39 |
| Resistin  | 0.194    | 0.024 | 4.30E-16  | 0.376  | 0.026 | 1.29E-46 |
| CRP       | 0.188    | 0.023 | 1.98E-15  | 0.383  | 0.024 | 9.59E-57 |
| ADM       | 0.304    | 0.021 | 6.97E-47  | 0.385  | 0.022 | 2.99E-65 |

|               |       |       |            |       |       |            |
|---------------|-------|-------|------------|-------|-------|------------|
| C2            | 0.240 | 0.023 | 6.93E-24   | 0.389 | 0.025 | 5.68E-52   |
| EFEMP1        | 0.347 | 0.020 | 3.19E-65   | 0.409 | 0.022 | 6.34E-74   |
| IGFBP1        | 0.679 | 0.022 | 2.63E-193  | 0.413 | 0.022 | 9.45E-79   |
| KLKB1         | 0.415 | 0.023 | 1.54E-68   | 0.443 | 0.025 | 5.94E-68   |
| IGF1          | 0.508 | 0.022 | 1.97E-117  | 0.451 | 0.024 | 2.85E-77   |
| CNTN1         | 0.518 | 0.023 | 8.27E-109  | 0.455 | 0.025 | 4.04E-72   |
| BNP           | 0.560 | 0.020 | 1.57E-156  | 0.470 | 0.022 | 1.67E-94   |
| Hemopexin     | 0.412 | 0.022 | 1.63E-72   | 0.579 | 0.024 | 3.23E-120  |
| Ceruloplasmin | 0.941 | 0.021 | <1.00E-500 | 0.908 | 0.023 | 1.02E-294  |
| Leptin        | 0.857 | 0.021 | <1.00E-500 | 1.052 | 0.018 | <1.00E-500 |

\* $\beta$ -coefficient: For women compared to men, 1 standard deviation increase in rank normalized biomarker.

+  $\beta$ -coefficient: higher in women

- $\beta$ -coefficient: higher in men

MV model adjusts for age, sex, SBP, HTN treatment, HDL, total cholesterol, BMI, DM, and smoking

**Supplemental Table 3. Multivariable-adjusted associations of single circulating biomarkers with sex stratified by smoking status**

| Biomarker   | Non-smoking (N=6079)  |       |           | Smoking (N=1105)      |       |          | Sex*smoking      |
|-------------|-----------------------|-------|-----------|-----------------------|-------|----------|------------------|
|             | $\beta$ -coefficient* | SE    | p-value   | $\beta$ -coefficient* | SE    | p-value  | P <sub>int</sub> |
| CD56        | -0.836                | 0.026 | 2.74E-214 | -0.855                | 0.060 | 1.80E-41 | 0.99             |
| Myoglobin   | -0.817                | 0.024 | 1.46E-222 | -0.736                | 0.059 | 1.11E-32 | 0.85             |
| GMP140      | -0.335                | 0.028 | 4.33E-32  | -0.361                | 0.063 | 4.77E-08 | 0.88             |
| sGP130      | -0.260                | 0.028 | 4.64E-20  | -0.357                | 0.062 | 4.14E-08 | 0.79             |
| BCHE        | -0.294                | 0.027 | 2.72E-26  | -0.173                | 0.062 | 0.010    | 0.18             |
| MMP8        | -0.244                | 0.028 | 8.52E-18  | -0.314                | 0.064 | 3.19E-06 | 0.48             |
| OSTEO       | -0.255                | 0.028 | 9.13E-19  | -0.209                | 0.065 | 0.002    | 0.65             |
| A1M         | -0.234                | 0.027 | 3.28E-17  | -0.120                | 0.062 | 0.080    | 0.68             |
| IGFBP2      | -0.201                | 0.025 | 8.11E-15  | -0.090                | 0.055 | 0.144    | 0.57             |
| REG1A       | -0.194                | 0.028 | 9.88E-12  | -0.145                | 0.061 | 0.028    | 0.80             |
| MCP1        | -0.184                | 0.027 | 4.08E-11  | -0.172                | 0.065 | 0.014    | 0.99             |
| Tetranectin | -0.169                | 0.029 | 1.91E-08  | -0.186                | 0.063 | 0.006    | 0.82             |
| CD163       | -0.158                | 0.029 | 1.06E-07  | -0.140                | 0.061 | 0.035    | 0.71             |
| MMP9        | -0.142                | 0.028 | 1.07E-06  | -0.212                | 0.062 | 0.001    | 0.71             |
| DPP4        | -0.136                | 0.029 | 7.00E-06  | -0.211                | 0.065 | 0.002    | 0.71             |
| GAPDH       | -0.119                | 0.029 | 7.47E-05  | -0.292                | 0.072 | 0.0001   | 0.38             |
| MCAM        | -0.152                | 0.027 | 8.49E-08  | -0.106                | 0.063 | 0.131    | 0.43             |
| TIMP1       | -0.125                | 0.024 | 7.17E-07  | -0.148                | 0.059 | 0.021    | 0.91             |
| PMP2        | -0.109                | 0.030 | 0.0005    | -0.124                | 0.062 | 0.070    | 0.87             |
| ADAM15      | -0.095                | 0.029 | 0.002     | -0.148                | 0.065 | 0.038    | 0.82             |
| PAI1        | -0.093                | 0.025 | 0.0003    | -0.121                | 0.060 | 0.065    | 0.85             |
| Cystatin C  | -0.104                | 0.025 | 6.65E-05  | -0.077                | 0.056 | 0.221    | 1.00             |
| COL18A1     | -0.104                | 0.028 | 0.0004    | -0.049                | 0.066 | 0.529    | 0.99             |
| Adipsin     | -0.084                | 0.025 | 0.002     | 0.044                 | 0.057 | 0.516    | 0.19             |
| NRCAM       | -0.047                | 0.029 | 0.150     | -0.082                | 0.063 | 0.251    | 0.82             |
| ApoB        | -0.039                | 0.018 | 0.050     | 0.023                 | 0.041 | 0.644    | 0.42             |
| LDLR        | -0.015                | 0.029 | 0.677     | -0.092                | 0.065 | 0.210    | 0.66             |
| CDH13       | -0.014                | 0.029 | 0.679     | -0.073                | 0.064 | 0.322    | 0.80             |

|           |        |       |          |        |       |           |      |
|-----------|--------|-------|----------|--------|-------|-----------|------|
| VEGF      | -0.018 | 0.029 | 0.609    | -0.083 | 0.066 | 0.265     | 0.45 |
| GDF15     | 0.004  | 0.020 | 0.865    | -0.036 | 0.047 | 0.520     | 0.71 |
| PON1      | 0.035  | 0.027 | 0.261    | -0.115 | 0.064 | 0.108     | 0.22 |
| TSC22D3   | 0.020  | 0.029 | 0.573    | -0.017 | 0.065 | 0.836     | 0.81 |
| Leptin R  | 0.040  | 0.028 | 0.210    | -0.058 | 0.066 | 0.455     | 0.22 |
| Notch1    | 0.027  | 0.029 | 0.432    | 0.124  | 0.064 | 0.079     | 0.66 |
| sICAM1    | 0.047  | 0.027 | 0.126    | 0.114  | 0.063 | 0.103     | 0.42 |
| CD40L     | 0.100  | 0.028 | 0.0008   | -0.025 | 0.069 | 0.769     | 0.42 |
| LPA       | 0.071  | 0.029 | 0.023    | 0.160  | 0.064 | 0.021     | 0.43 |
| ANGPTL3   | 0.093  | 0.025 | 0.0004   | 0.125  | 0.059 | 0.052     | 0.82 |
| PPBP      | 0.126  | 0.029 | 3.99E-05 | 0.034  | 0.068 | 0.677     | 0.71 |
| UCMGP     | 0.106  | 0.025 | 5.39E-05 | 0.196  | 0.055 | 0.0008    | 0.34 |
| B2M       | 0.116  | 0.025 | 9.61E-06 | 0.145  | 0.056 | 0.017     | 0.80 |
| AGP1      | 0.122  | 0.027 | 1.39E-05 | 0.126  | 0.060 | 0.056     | 0.68 |
| Pzi       | 0.156  | 0.029 | 2.07E-07 | 0.011  | 0.066 | 0.884     | 0.14 |
| APOA1     | 0.160  | 0.023 | 1.16E-11 | 0.129  | 0.052 | 0.022     | 0.80 |
| SDF1      | 0.181  | 0.029 | 1.63E-09 | 0.094  | 0.067 | 0.210     | 0.46 |
| CD5L      | 0.183  | 0.028 | 2.42E-10 | 0.179  | 0.061 | 0.007     | 0.85 |
| MPO       | 0.192  | 0.028 | 6.54E-11 | 0.167  | 0.064 | 0.015     | 0.68 |
| BIKUNIN   | 0.170  | 0.029 | 1.27E-08 | 0.299  | 0.067 | 2.49E-05  | 0.41 |
| GRN       | 0.223  | 0.029 | 6.52E-14 | 0.172  | 0.063 | 0.011     | 0.61 |
| Clusterin | 0.203  | 0.029 | 1.14E-11 | 0.261  | 0.068 | 0.0003    | 0.58 |
| IGFBP3    | 0.234  | 0.029 | 1.50E-15 | 0.245  | 0.066 | 0.0005    | 0.94 |
| GP5       | 0.255  | 0.029 | 5.22E-18 | 0.153  | 0.068 | 0.040     | 0.61 |
| CXCL16    | 0.266  | 0.028 | 1.12E-20 | 0.255  | 0.066 | 0.0002    | 0.76 |
| SRAGE     | 0.286  | 0.028 | 4.86E-24 | 0.222  | 0.066 | 0.002     | 0.22 |
| CD14      | 0.292  | 0.028 | 4.91E-24 | 0.308  | 0.063 | 3.00E-06  | 0.87 |
| SAA1      | 0.334  | 0.026 | 2.21E-35 | 0.198  | 0.064 | 0.004     | 0.14 |
| FBN       | 0.329  | 0.026 | 2.29E-34 | 0.316  | 0.060 | 4.69E-07  | 0.57 |
| FGF23     | 0.331  | 0.029 | 3.38E-29 | 0.455  | 0.065 | 2.19E-11  | 0.35 |
| Resistin  | 0.360  | 0.028 | 5.47E-36 | 0.441  | 0.064 | 3.891E-11 | 0.82 |
| CRP       | 0.411  | 0.026 | 1.89E-54 | 0.230  | 0.059 | 0.0002    | 0.01 |



|               |       |       |            |       |       |          |        |
|---------------|-------|-------|------------|-------|-------|----------|--------|
| ADM           | 0.406 | 0.024 | 2.16E-60   | 0.289 | 0.055 | 4.91E-07 | 0.42   |
| C2            | 0.405 | 0.028 | 3.80E-47   | 0.310 | 0.062 | 1.57E-06 | 0.41   |
| EFEMP1        | 0.412 | 0.024 | 1.42E-62   | 0.398 | 0.054 | 2.24E-12 | 0.57   |
| IGFBP1        | 0.446 | 0.023 | 4.20E-77   | 0.252 | 0.054 | 7.90E-06 | 0.003  |
| KLKB1         | 0.467 | 0.027 | 3.67E-62   | 0.328 | 0.060 | 1.62E-07 | 0.10   |
| IGF1          | 0.412 | 0.026 | 3.52E-55   | 0.628 | 0.060 | 7.65E-24 | 0.02   |
| CNTN1         | 0.432 | 0.027 | 1.20E-55   | 0.553 | 0.064 | 1.28E-16 | 0.42   |
| BNP           | 0.455 | 0.024 | 6.15E-75   | 0.544 | 0.056 | 1.14E-20 | 0.81   |
| Hemopexin     | 0.587 | 0.026 | 5.94E-104  | 0.530 | 0.060 | 3.05E-17 | 0.42   |
| Ceruloplasmin | 0.945 | 0.026 | 1.49E-264  | 0.722 | 0.056 | 1.00E-34 | 0.0009 |
| Leptin        | 1.071 | 0.020 | <1.00E-500 | 0.950 | 0.047 | 5.99E-76 | 0.22   |

\* $\beta$ -coefficient: For women compared to men, 1 standard deviation increase in rank normalized biomarker.

+  $\beta$ -coefficient: higher in women

- $\beta$ -coefficient: higher in men

MV model adjusts for age, sex, SBP, HTN treatment, HDL, total cholesterol, BMI, and DM

Interaction term was fitted in a sex-pooled model.

**Supplemental Table 4. Multivariable-adjusted associations of single circulating biomarkers with menopausal/hormone status**

| Biomarker   | Women   |       |           | Pre-menopausal women |       |          | Post-menopausal women |       |           | No HRT  |       |          | HRT     |       |          |
|-------------|---------|-------|-----------|----------------------|-------|----------|-----------------------|-------|-----------|---------|-------|----------|---------|-------|----------|
|             | $\beta$ | SE    | P         | $\beta$              | SE    | P        | $\beta$               | SE    | P         | $\beta$ | SE    | p-value  | $\beta$ | SE    | p-value  |
| CD56        | -0.839  | 0.024 | 5.03E-254 | -0.786               | 0.061 | 1.04E-35 | -0.679                | 0.033 | 2.82E-86  | -0.522  | 0.038 | 6.74E-41 | -0.914  | 0.048 | 2.27E-76 |
| Myoglobin   | -0.803  | 0.023 | 2.00E-252 | -0.796               | 0.056 | 3.59E-43 | -0.703                | 0.032 | 9.39E-103 | -0.637  | 0.036 | 2.96E-67 | -0.794  | 0.044 | 1.32E-66 |
| GMP140      | -0.338  | 0.025 | 4.72E-39  | -0.529               | 0.064 | 1.43E-15 | -0.234                | 0.036 | 1.89E-10  | -0.180  | 0.040 | 2.42E-05 | -0.346  | 0.050 | 2.26E-11 |
| sGP130      | -0.278  | 0.025 | 3.73E-27  | -0.407               | 0.063 | 5.27E-10 | -0.057                | 0.035 | 0.152     | 0.061   | 0.039 | 0.213    | -0.289  | 0.049 | 1.09E-08 |
| BCHE        | -0.274  | 0.025 | 2.31E-27  | -0.345               | 0.063 | 1.60E-07 | -0.060                | 0.035 | 0.132     | 0.053   | 0.039 | 0.282    | -0.232  | 0.049 | 5.37E-06 |
| MMP8        | -0.254  | 0.025 | 7.72E-23  | -0.288               | 0.063 | 1.66E-05 | -0.264                | 0.035 | 3.94E-13  | -0.226  | 0.040 | 4.91E-08 | -0.331  | 0.050 | 1.51E-10 |
| OSTEO       | -0.245  | 0.026 | 1.01E-20  | -0.218               | 0.059 | 0.0005   | -0.137                | 0.035 | 0.0002    | 0.095   | 0.039 | 0.027    | -0.579  | 0.047 | 8.20E-33 |
| AIM         | -0.215  | 0.025 | 1.47E-17  | -0.433               | 0.062 | 1.74E-11 | -0.065                | 0.035 | 0.101     | -0.038  | 0.040 | 0.457    | -0.115  | 0.049 | 0.034    |
| IGFBP2      | -0.188  | 0.023 | 1.03E-15  | -0.191               | 0.054 | 0.0009   | -0.186                | 0.031 | 7.22E-09  | -0.011  | 0.034 | 0.833    | -0.580  | 0.043 | 9.11E-40 |
| REG1A       | -0.187  | 0.025 | 3.52E-13  | -0.447               | 0.062 | 3.81E-12 | -0.100                | 0.035 | 0.008     | -0.011  | 0.039 | 0.849    | -0.287  | 0.049 | 1.86E-08 |
| MCP1        | -0.182  | 0.025 | 1.05E-12  | -0.359               | 0.062 | 3.83E-08 | 0.026                 | 0.035 | 0.521     | 0.083   | 0.039 | 0.064    | -0.093  | 0.049 | 0.092    |
| Tetranectin | -0.173  | 0.026 | 1.63E-10  | -0.139               | 0.061 | 0.042    | 0.069                 | 0.036 | 0.091     | 0.329   | 0.039 | 1.19E-16 | -0.406  | 0.048 | 2.98E-16 |
| CD163       | -0.155  | 0.026 | 5.10E-09  | -0.330               | 0.065 | 1.63E-06 | -0.003                | 0.037 | 0.935     | 0.056   | 0.041 | 0.282    | -0.104  | 0.052 | 0.075    |
| MMP9        | -0.152  | 0.026 | 6.13E-09  | -0.108               | 0.063 | 0.137    | -0.114                | 0.035 | 0.003     | -0.053  | 0.040 | 0.282    | -0.224  | 0.051 | 3.27E-05 |
| DPP4        | -0.149  | 0.027 | 4.16E-08  | -0.218               | 0.066 | 0.002    | 0.070                 | 0.038 | 0.098     | 0.147   | 0.042 | 0.001    | -0.064  | 0.053 | 0.292    |
| GAPDH       | -0.146  | 0.027 | 9.98E-08  | -0.428               | 0.064 | 1.40E-10 | -0.068                | 0.036 | 0.098     | -0.037  | 0.041 | 0.481    | -0.032  | 0.051 | 0.593    |
| MCAM        | -0.145  | 0.025 | 1.61E-08  | -0.099               | 0.062 | 0.168    | -0.039                | 0.035 | 0.363     | 0.107   | 0.040 | 0.014    | -0.342  | 0.049 | 1.52E-11 |
| TIMP1       | -0.130  | 0.022 | 1.48E-08  | -0.124               | 0.055 | 0.044    | -0.028                | 0.030 | 0.422     | 0.030   | 0.035 | 0.490    | -0.146  | 0.043 | 0.002    |
| PMP2        | -0.112  | 0.027 | 5.03E-05  | -0.138               | 0.066 | 0.064    | -0.040                | 0.037 | 0.370     | -0.035  | 0.042 | 0.504    | -0.055  | 0.052 | 0.356    |
| ADAM15      | -0.105  | 0.027 | 0.0001    | -0.106               | 0.066 | 0.163    | -0.036                | 0.037 | 0.406     | -0.017  | 0.042 | 0.776    | -0.078  | 0.052 | 0.186    |
| PAI1        | -0.103  | 0.023 | 1.04E-05  | -0.080               | 0.055 | 0.201    | -0.066                | 0.031 | 0.063     | 0.031   | 0.035 | 0.481    | -0.230  | 0.044 | 5.58E-07 |
| Cystatin C  | -0.099  | 0.023 | 2.28E-05  | -0.239               | 0.054 | 3.29E-05 | 0.033                 | 0.030 | 0.370     | 0.113   | 0.034 | 0.002    | -0.104  | 0.043 | 0.027    |
| COL18A1     | -0.094  | 0.026 | 0.0004    | -0.287               | 0.062 | 1.37E-05 | -0.040                | 0.037 | 0.369     | 0.003   | 0.041 | 0.971    | -0.093  | 0.051 | 0.102    |
| Adipsin     | -0.064  | 0.023 | 0.008     | 0.117                | 0.056 | 0.063    | -0.034                | 0.032 | 0.370     | 0.031   | 0.036 | 0.499    | -0.145  | 0.044 | 0.003    |
| NRCAM       | -0.053  | 0.027 | 0.065     | -0.094               | 0.067 | 0.213    | -0.007                | 0.037 | 0.871     | -0.005  | 0.042 | 0.952    | -0.023  | 0.053 | 0.722    |

|           |        |       |          |        |       |          |        |       |          |        |       |          |        |       |          |
|-----------|--------|-------|----------|--------|-------|----------|--------|-------|----------|--------|-------|----------|--------|-------|----------|
| ApoB      | -0.028 | 0.017 | 0.122    | 0.012  | 0.041 | 0.827    | -0.024 | 0.023 | 0.370    | -0.051 | 0.026 | 0.091    | 0.055  | 0.032 | 0.135    |
| LDLR      | -0.028 | 0.027 | 0.359    | 0.130  | 0.065 | 0.075    | 0.008  | 0.037 | 0.866    | -0.011 | 0.041 | 0.850    | 0.020  | 0.052 | 0.746    |
| CDH13     | -0.025 | 0.027 | 0.406    | -0.010 | 0.066 | 0.920    | 0.011  | 0.037 | 0.823    | 0.005  | 0.042 | 0.952    | 0.010  | 0.052 | 0.851    |
| VEGF      | -0.025 | 0.026 | 0.406    | -0.188 | 0.065 | 0.008    | -0.009 | 0.036 | 0.837    | -0.036 | 0.041 | 0.484    | 0.078  | 0.051 | 0.183    |
| GDF15     | -0.003 | 0.019 | 0.880    | -0.182 | 0.042 | 4.56E-05 | -0.006 | 0.023 | 0.829    | -0.034 | 0.026 | 0.288    | 0.010  | 0.033 | 0.793    |
| PON1      | 0.011  | 0.025 | 0.698    | -0.137 | 0.061 | 0.044    | 0.084  | 0.034 | 0.027    | 0.017  | 0.039 | 0.776    | 0.189  | 0.048 | 0.0001   |
| TSC22D3   | 0.015  | 0.027 | 0.616    | 0.041  | 0.066 | 0.605    | 0.032  | 0.037 | 0.457    | -0.059 | 0.042 | 0.270    | -0.012 | 0.052 | 0.831    |
| Leptin R  | 0.025  | 0.026 | 0.406    | -0.038 | 0.065 | 0.635    | 0.065  | 0.037 | 0.115    | 0.054  | 0.042 | 0.285    | 0.086  | 0.051 | 0.137    |
| Notch1    | 0.045  | 0.026 | 0.114    | 0.094  | 0.063 | 0.197    | 0.101  | 0.036 | 0.010    | 0.112  | 0.041 | 0.014    | 0.140  | 0.050 | 0.010    |
| sICAM1    | 0.058  | 0.025 | 0.030    | -0.134 | 0.065 | 0.064    | 0.186  | 0.034 | 1.85E-07 | 0.169  | 0.039 | 4.32E-05 | 0.191  | 0.050 | 0.0003   |
| CD40L     | 0.082  | 0.026 | 0.003    | -0.371 | 0.064 | 2.80E-08 | 0.102  | 0.036 | 0.008    | 0.108  | 0.041 | 0.015    | 0.100  | 0.050 | 0.075    |
| Lpa       | 0.085  | 0.027 | 0.002    | 0.169  | 0.065 | 0.019    | 0.071  | 0.037 | 0.093    | 0.102  | 0.042 | 0.027    | -0.024 | 0.052 | 0.715    |
| ANGPTL3   | 0.096  | 0.023 | 4.97E-05 | 0.137  | 0.056 | 0.027    | 0.253  | 0.032 | 1.16E-14 | 0.414  | 0.036 | 1.73E-29 | 0.012  | 0.044 | 0.811    |
| PPBP      | 0.110  | 0.027 | 6.12E-05 | 0.002  | 0.067 | 0.987    | 0.076  | 0.038 | 0.079    | 0.056  | 0.042 | 0.285    | 0.078  | 0.054 | 0.205    |
| UCMGP     | 0.118  | 0.023 | 3.78E-07 | 0.248  | 0.056 | 2.85E-05 | 0.093  | 0.032 | 0.008    | 0.104  | 0.036 | 0.009    | 0.051  | 0.045 | 0.320    |
| B2M       | 0.119  | 0.023 | 4.17E-07 | 0.082  | 0.055 | 0.193    | 0.175  | 0.030 | 2.43E-08 | 0.219  | 0.034 | 6.12E-10 | 0.123  | 0.043 | 0.009    |
| AGP1      | 0.120  | 0.025 | 1.95E-06 | 0.079  | 0.060 | 0.246    | 0.147  | 0.034 | 3.10E-05 | 0.253  | 0.038 | 8.05E-11 | -0.108 | 0.047 | 0.038    |
| PZI       | 0.135  | 0.027 | 6.57E-07 | 0.160  | 0.065 | 0.027    | 0.217  | 0.037 | 1.01E-08 | 0.177  | 0.041 | 4.23E-05 | 0.325  | 0.052 | 1.40E-09 |
| APOA1     | 0.151  | 0.021 | 1.68E-12 | 0.064  | 0.050 | 0.266    | 0.163  | 0.028 | 1.90E-08 | 0.049  | 0.031 | 0.212    | 0.319  | 0.039 | 3.62E-15 |
| SDF1      | 0.165  | 0.027 | 1.29E-09 | 0.081  | 0.065 | 0.275    | 0.182  | 0.037 | 1.82E-06 | 0.210  | 0.042 | 1.27E-06 | 0.147  | 0.052 | 0.009    |
| CD5L      | 0.182  | 0.026 | 3.05E-12 | 0.352  | 0.065 | 2.80E-07 | 0.132  | 0.037 | 0.0007   | 0.138  | 0.042 | 0.002    | 0.146  | 0.052 | 0.009    |
| MPO       | 0.188  | 0.026 | 1.52E-12 | 0.238  | 0.064 | 0.0005   | 0.227  | 0.036 | 1.29E-09 | 0.372  | 0.041 | 7.75E-19 | -0.072 | 0.050 | 0.205    |
| BIKUNIN   | 0.192  | 0.026 | 1.20E-12 | 0.059  | 0.067 | 0.446    | 0.174  | 0.038 | 1.12E-05 | 0.198  | 0.043 | 1.01E-05 | 0.104  | 0.054 | 0.082    |
| GRN       | 0.212  | 0.026 | 2.82E-15 | 0.084  | 0.065 | 0.263    | 0.304  | 0.037 | 5.95E-16 | 0.355  | 0.041 | 5.99E-17 | 0.211  | 0.052 | 0.0001   |
| Clusterin | 0.216  | 0.027 | 1.50E-15 | 0.208  | 0.062 | 0.002    | 0.287  | 0.033 | 3.77E-17 | 0.244  | 0.038 | 7.49E-10 | 0.377  | 0.048 | 3.31E-14 |
| IGFBP3    | 0.235  | 0.026 | 1.28E-18 | 0.120  | 0.066 | 0.106    | 0.272  | 0.037 | 8.26E-13 | 0.335  | 0.042 | 6.33E-15 | 0.159  | 0.052 | 0.005    |
| GP5       | 0.235  | 0.027 | 2.98E-18 | 0.287  | 0.065 | 3.29E-05 | 0.232  | 0.037 | 6.87E-10 | 0.182  | 0.042 | 3.07E-05 | 0.390  | 0.052 | 2.66E-13 |
| CXCL16    | 0.266  | 0.026 | 2.02E-24 | 0.065  | 0.064 | 0.390    | 0.304  | 0.037 | 6.41E-16 | 0.290  | 0.042 | 1.51E-11 | 0.344  | 0.051 | 7.59E-11 |
| SRAGE     | 0.281  | 0.026 | 3.73E-27 | 0.369  | 0.064 | 4.98E-08 | 0.370  | 0.037 | 6.13E-23 | 0.445  | 0.042 | 2.52E-25 | 0.280  | 0.051 | 9.45E-08 |

|               |       |       |            |       |       |           |       |       |            |       |       |           |        |       |           |
|---------------|-------|-------|------------|-------|-------|-----------|-------|-------|------------|-------|-------|-----------|--------|-------|-----------|
| CD14          | 0.291 | 0.026 | 1.30E-28   | 0.331 | 0.063 | 5.17E-07  | 0.289 | 0.035 | 1.39E-15   | 0.392 | 0.039 | 2.52E-22  | 0.064  | 0.051 | 0.265     |
| SAA1          | 0.314 | 0.024 | 8.46E-37   | 0.239 | 0.059 | 0.0002    | 0.381 | 0.033 | 2.09E-30   | 0.366 | 0.037 | 5.06E-22  | 0.419  | 0.047 | 3.36E-18  |
| FBN           | 0.328 | 0.024 | 1.97E-40   | 0.257 | 0.059 | 3.94E-05  | 0.300 | 0.033 | 3.92E-19   | 0.361 | 0.037 | 2.12E-21  | 0.176  | 0.046 | 0.0003    |
| FGF23         | 0.353 | 0.027 | 2.29E-39   | 0.485 | 0.067 | 3.81E-12  | 0.320 | 0.037 | 3.04E-17   | 0.298 | 0.042 | 5.43E-12  | 0.382  | 0.053 | 2.34E-12  |
| Resistin      | 0.376 | 0.026 | 1.29E-46   | 0.508 | 0.064 | 1.76E-14  | 0.265 | 0.037 | 2.03E-12   | 0.206 | 0.041 | 1.78E-06  | 0.374  | 0.052 | 1.09E-12  |
| CRP           | 0.383 | 0.024 | 9.59E-57   | 0.213 | 0.055 | 0.0003    | 0.376 | 0.031 | 1.70E-32   | 0.234 | 0.034 | 4.47E-11  | 0.626  | 0.044 | 3.41E-44  |
| ADM           | 0.385 | 0.022 | 2.99E-65   | 0.634 | 0.051 | 8.72E-33  | 0.380 | 0.029 | 7.06E-38   | 0.300 | 0.033 | 2.78E-19  | 0.529  | 0.040 | 2.86E-37  |
| C2            | 0.389 | 0.025 | 5.68E-52   | 0.293 | 0.061 | 6.71E-06  | 0.470 | 0.035 | 1.61E-39   | 0.389 | 0.039 | 3.14E-22  | 0.609  | 0.049 | 1.38E-33  |
| EFEMP1        | 0.409 | 0.022 | 6.34E-74   | 0.302 | 0.056 | 2.53E-07  | 0.339 | 0.031 | 1.16E-26   | 0.368 | 0.036 | 7.78E-24  | 0.276  | 0.043 | 8.36E-10  |
| IGFBP1        | 0.413 | 0.022 | 9.45E-79   | 0.326 | 0.051 | 8.09E-10  | 0.405 | 0.029 | 2.05E-41   | 0.218 | 0.032 | 6.44E-11  | 0.710  | 0.040 | 1.51E-64  |
| KLKB1         | 0.443 | 0.025 | 5.94E-68   | 0.093 | 0.060 | 0.177     | 0.622 | 0.034 | 6.96E-72   | 0.503 | 0.037 | 2.00E-39  | 0.876  | 0.047 | 2.98E-71  |
| IGF1          | 0.451 | 0.024 | 2.85E-77   | 0.500 | 0.056 | 4.69E-18  | 0.292 | 0.033 | 7.66E-18   | 0.476 | 0.037 | 1.69E-36  | -0.050 | 0.044 | 0.323     |
| CNTN1         | 0.455 | 0.025 | 4.04E-72   | 0.574 | 0.060 | 3.70E-20  | 0.500 | 0.034 | 1.21E-45   | 0.630 | 0.038 | 9.85E-57  | 0.303  | 0.048 | 1.01E-09  |
| BNP           | 0.470 | 0.022 | 1.67E-94   | 0.471 | 0.059 | 1.20E-14  | 0.335 | 0.032 | 1.32E-24   | 0.279 | 0.036 | 9.56E-14  | 0.429  | 0.046 | 9.10E-20  |
| Hemopexin     | 0.579 | 0.024 | 3.23E-120  | 0.569 | 0.059 | 1.29E-20  | 0.452 | 0.033 | 6.52E-40   | 0.374 | 0.037 | 1.82E-22  | 0.599  | 0.047 | 6.44E-36  |
| Ceruloplasmin | 0.908 | 0.023 | 1.02E-294  | 0.760 | 0.053 | 3.59E-43  | 0.857 | 0.030 | 1.17E-157  | 0.621 | 0.033 | 5.48E-74  | 1.288  | 0.042 | 2.63E-178 |
| Leptin        | 1.052 | 0.018 | <1.00E-500 | 1.024 | 0.044 | 4.72E-108 | 1.077 | 0.025 | <1.00E-500 | 1.061 | 0.028 | 3.45E-258 | 1.121  | 0.035 | 1.05E-187 |

\* $\beta$ -coefficient: For women compared to men, 1 standard deviation increase in rank normalized biomarker.

+  $\beta$ -coefficient: higher in women

- $\beta$ -coefficient: higher in men

MV model adjusts for age, sex, SBP, HTN treatment, HDL, total cholesterol, BMI, and DM

**Supplemental Table 5. Multivariable-adjusted associations of single circulating biomarkers with menopausal/hormone status compared with age distribution matched men**

| Biomarker   | Women   |       |           | Pre-menopausal women |       |          | Post-menopausal women |       |           | No HRT  |       |          | HRT     |       |          |
|-------------|---------|-------|-----------|----------------------|-------|----------|-----------------------|-------|-----------|---------|-------|----------|---------|-------|----------|
|             | $\beta$ | SE    | P         | $\beta$              | SE    | P        | $\beta$               | SE    | P         | $\beta$ | SE    | p-value  | $\beta$ | SE    | p-value  |
| CD56        | -0.839  | 0.024 | 5.03E-254 | -0.835               | 0.049 | 2.05E-61 | -0.630                | 0.033 | 3.10E-75  | -0.552  | 0.042 | 2.34E-37 | -0.933  | 0.053 | 2.02E-62 |
| Myoglobin   | -0.803  | 0.023 | 2.00E-252 | -0.851               | 0.046 | 3.01E-69 | -0.781                | 0.031 | 1.40E-127 | -0.623  | 0.039 | 2.50E-53 | -0.803  | 0.050 | 1.35E-53 |
| GMP140      | -0.338  | 0.025 | 4.72E-39  | -0.642               | 0.052 | 1.30E-33 | -0.307                | 0.035 | 7.22E-18  | -0.181  | 0.044 | 0.0001   | -0.295  | 0.055 | 3.55E-07 |
| sGP130      | -0.278  | 0.025 | 3.73E-27  | -0.609               | 0.052 | 6.13E-30 | -0.032                | 0.034 | 0.443     | 0.059   | 0.043 | 0.270    | -0.269  | 0.055 | 2.63E-06 |
| BCHE        | -0.274  | 0.025 | 2.31E-27  | -0.433               | 0.051 | 2.14E-16 | -0.144                | 0.035 | 7.52E-05  | 0.029   | 0.043 | 0.619    | -0.238  | 0.055 | 4.04E-05 |
| MMP8        | -0.254  | 0.025 | 7.72E-23  | -0.418               | 0.051 | 2.27E-15 | -0.351                | 0.035 | 8.11E-23  | -0.228  | 0.044 | 9.31E-07 | -0.345  | 0.056 | 3.76E-09 |
| OSTEO       | -0.245  | 0.026 | 1.01E-20  | -0.280               | 0.051 | 8.70E-08 | -0.186                | 0.035 | 4.13E-07  | 0.090   | 0.043 | 0.069    | -0.536  | 0.054 | 4.16E-22 |
| A1M         | -0.215  | 0.025 | 1.47E-17  | -0.533               | 0.049 | 4.92E-26 | -0.042                | 0.034 | 0.314     | -0.036  | 0.044 | 0.575    | -0.067  | 0.056 | 0.302    |
| IGFBP2      | -0.188  | 0.023 | 1.03E-15  | -0.359               | 0.044 | 2.22E-15 | -0.005                | 0.034 | 0.901     | 0.028   | 0.037 | 0.586    | -0.469  | 0.048 | 5.30E-21 |
| REG1A       | -0.187  | 0.025 | 3.52E-13  | -0.428               | 0.050 | 1.65E-16 | -0.028                | 0.034 | 0.490     | 0.001   | 0.042 | 0.990    | -0.282  | 0.057 | 1.88E-06 |
| MCP1        | -0.182  | 0.025 | 1.05E-12  | -0.387               | 0.049 | 1.65E-14 | -0.029                | 0.034 | 0.490     | 0.068   | 0.043 | 0.193    | -0.102  | 0.056 | 0.114    |
| Tetranectin | -0.173  | 0.026 | 1.63E-10  | -0.177               | 0.051 | 0.001    | 0.145                 | 0.035 | 9.02E-05  | 0.358   | 0.042 | 3.11E-16 | -0.393  | 0.054 | 3.54E-12 |
| CD163       | -0.155  | 0.026 | 5.10E-09  | -0.347               | 0.052 | 9.12E-11 | -0.093                | 0.035 | 0.014     | 0.037   | 0.045 | 0.575    | -0.066  | 0.058 | 0.324    |
| MMP9        | -0.152  | 0.026 | 6.13E-09  | -0.207               | 0.051 | 9.05E-05 | -0.217                | 0.035 | 2.93E-09  | -0.074  | 0.042 | 0.135    | -0.236  | 0.058 | 0.0001   |
| DPP4        | -0.149  | 0.027 | 4.16E-08  | -0.187               | 0.052 | 0.0007   | 0.167                 | 0.036 | 8.93E-06  | 0.120   | 0.047 | 0.020    | -0.037  | 0.059 | 0.578    |
| GAPDH       | -0.146  | 0.027 | 9.98E-08  | -0.579               | 0.053 | 1.93E-26 | -0.091                | 0.035 | 0.015     | -0.014  | 0.045 | 0.795    | -0.054  | 0.057 | 0.406    |
| MCAM        | -0.145  | 0.025 | 1.61E-08  | -0.225               | 0.051 | 2.35E-05 | 0.138                 | 0.035 | 0.0002    | 0.114   | 0.044 | 0.020    | -0.332  | 0.055 | 8.76E-09 |
| TIMP1       | -0.130  | 0.022 | 1.48E-08  | -0.319               | 0.047 | 2.87E-11 | -0.143                | 0.030 | 5.36E-06  | 0.030   | 0.037 | 0.581    | -0.077  | 0.048 | 0.162    |
| PMP2        | -0.112  | 0.027 | 5.03E-05  | -0.106               | 0.055 | 0.074    | -0.051                | 0.036 | 0.224     | -0.046  | 0.047 | 0.472    | 0.028   | 0.058 | 0.675    |
| ADAM15      | -0.105  | 0.027 | 0.0001    | -0.109               | 0.054 | 0.062    | -0.032                | 0.035 | 0.458     | -0.017  | 0.046 | 0.777    | -0.013  | 0.058 | 0.825    |
| PAI1        | -0.103  | 0.023 | 1.04E-05  | 0.037                | 0.047 | 0.468    | -0.250                | 0.033 | 2.48E-13  | -0.013  | 0.037 | 0.783    | -0.264  | 0.050 | 4.60E-07 |
| Cystatin C  | -0.099  | 0.023 | 2.28E-05  | -0.501               | 0.047 | 2.34E-25 | -0.092                | 0.030 | 0.005     | 0.089   | 0.037 | 0.033    | -0.057  | 0.048 | 0.302    |
| COL18A1     | -0.094  | 0.026 | 0.0004    | -0.232               | 0.049 | 6.23E-06 | -0.062                | 0.036 | 0.127     | 0.005   | 0.046 | 0.945    | -0.061  | 0.058 | 0.360    |
| Adipsin     | -0.064  | 0.023 | 0.008     | 0.104                | 0.046 | 0.034    | -0.124                | 0.033 | 0.0004    | 0.030   | 0.040 | 0.586    | -0.101  | 0.051 | 0.086    |

|           |        |       |          |        |       |          |        |       |          |        |       |          |        |       |          |
|-----------|--------|-------|----------|--------|-------|----------|--------|-------|----------|--------|-------|----------|--------|-------|----------|
| NRCAM     | -0.053 | 0.027 | 0.065    | -0.050 | 0.054 | 0.400    | 0.005  | 0.036 | 0.902    | -0.015 | 0.047 | 0.795    | 0.044  | 0.059 | 0.511    |
| ApoB      | -0.028 | 0.017 | 0.122    | 0.071  | 0.034 | 0.053    | -0.168 | 0.034 | 2.23E-06 | -0.058 | 0.028 | 0.065    | 0.058  | 0.037 | 0.174    |
| LDLR      | -0.028 | 0.027 | 0.359    | 0.213  | 0.054 | 0.0001   | -0.023 | 0.035 | 0.586    | -0.026 | 0.046 | 0.699    | 0.071  | 0.058 | 0.301    |
| CDH13     | -0.025 | 0.027 | 0.406    | 0.040  | 0.055 | 0.504    | -0.006 | 0.035 | 0.901    | -0.014 | 0.046 | 0.795    | 0.078  | 0.058 | 0.256    |
| VEGF      | -0.025 | 0.026 | 0.406    | -0.067 | 0.053 | 0.247    | -0.036 | 0.035 | 0.405    | -0.034 | 0.045 | 0.586    | 0.094  | 0.058 | 0.162    |
| GDF15     | -0.003 | 0.019 | 0.880    | -0.184 | 0.039 | 4.35E-06 | -0.065 | 0.024 | 0.010    | -0.037 | 0.028 | 0.301    | 0.023  | 0.036 | 0.574    |
| PON1      | 0.011  | 0.025 | 0.698    | 0.047  | 0.051 | 0.400    | 0.334  | 0.034 | 1.51E-21 | 0.046  | 0.043 | 0.429    | 0.232  | 0.053 | 3.17E-05 |
| TSC22D3   | 0.015  | 0.027 | 0.616    | -0.020 | 0.055 | 0.718    | 0.041  | 0.035 | 0.330    | 0.054  | 0.046 | 0.359    | -0.038 | 0.057 | 0.566    |
| Leptin R  | 0.025  | 0.026 | 0.406    | 0.065  | 0.052 | 0.253    | 0.142  | 0.035 | 0.0001   | 0.078  | 0.046 | 0.145    | 0.075  | 0.058 | 0.269    |
| Notch1    | 0.045  | 0.026 | 0.114    | 0.262  | 0.052 | 1.13E-06 | -0.066 | 0.036 | 0.098    | 0.098  | 0.045 | 0.059    | 0.120  | 0.057 | 0.061    |
| sICAM1    | 0.058  | 0.025 | 0.030    | -0.215 | 0.053 | 0.0001   | 0.041  | 0.034 | 0.318    | 0.157  | 0.042 | 0.0006   | 0.204  | 0.056 | 0.0006   |
| CD40L     | 0.082  | 0.026 | 0.003    | -0.383 | 0.053 | 2.66E-12 | 0.111  | 0.034 | 0.002    | 0.141  | 0.044 | 0.003    | 0.145  | 0.056 | 0.019    |
| Lpa       | 0.085  | 0.027 | 0.002    | 0.244  | 0.052 | 6.45E-06 | 0.100  | 0.036 | 0.009    | 0.097  | 0.045 | 0.059    | -0.019 | 0.059 | 0.780    |
| ANGPTL3   | 0.096  | 0.023 | 4.97E-05 | 0.063  | 0.045 | 0.201    | 0.062  | 0.034 | 0.108    | 0.379  | 0.039 | 6.20E-21 | -0.026 | 0.051 | 0.651    |
| PPBP      | 0.110  | 0.027 | 6.12E-05 | 0.109  | 0.056 | 0.070    | 0.077  | 0.036 | 0.053    | 0.055  | 0.046 | 0.359    | 0.158  | 0.060 | 0.019    |
| UCMGP     | 0.118  | 0.023 | 3.78E-07 | 0.078  | 0.045 | 0.112    | 0.030  | 0.033 | 0.450    | 0.113  | 0.040 | 0.011    | 0.044  | 0.051 | 0.455    |
| B2M       | 0.119  | 0.023 | 4.17E-07 | 0.126  | 0.046 | 0.010    | -0.002 | 0.030 | 0.954    | 0.214  | 0.037 | 3.14E-08 | 0.137  | 0.049 | 0.010    |
| AGP1      | 0.120  | 0.025 | 1.95E-06 | 0.118  | 0.048 | 0.021    | 0.037  | 0.035 | 0.380    | 0.265  | 0.042 | 1.01E-09 | -0.070 | 0.054 | 0.269    |
| PZI       | 0.135  | 0.027 | 6.57E-07 | 0.253  | 0.054 | 6.80E-06 | 0.155  | 0.035 | 2.72E-05 | 0.137  | 0.045 | 0.005    | 0.320  | 0.059 | 2.37E-07 |
| APOA1     | 0.151  | 0.021 | 1.68E-12 | 0.145  | 0.043 | 0.002    | 0.719  | 0.033 | 5.56E-95 | 0.084  | 0.034 | 0.027    | 0.336  | 0.044 | 3.62E-13 |
| SDF1      | 0.165  | 0.027 | 1.29E-09 | -0.102 | 0.055 | 0.083    | 0.226  | 0.035 | 6.06E-10 | 0.207  | 0.045 | 1.48E-05 | 0.224  | 0.057 | 0.0003   |
| CD5L      | 0.182  | 0.026 | 3.05E-12 | 0.227  | 0.052 | 3.08E-05 | -0.116 | 0.036 | 0.002    | 0.134  | 0.045 | 0.007    | 0.125  | 0.059 | 0.061    |
| MPO       | 0.188  | 0.026 | 1.52E-12 | 0.059  | 0.051 | 0.287    | 0.069  | 0.036 | 0.095    | 0.384  | 0.046 | 4.26E-16 | -0.019 | 0.057 | 0.778    |
| BIKUNIN   | 0.192  | 0.026 | 1.20E-12 | 0.117  | 0.054 | 0.047    | 0.162  | 0.037 | 2.86E-05 | 0.183  | 0.047 | 0.0002   | 0.147  | 0.061 | 0.031    |
| GRN       | 0.212  | 0.026 | 2.82E-15 | 0.157  | 0.053 | 0.005    | 0.231  | 0.036 | 2.92E-10 | 0.347  | 0.046 | 2.98E-13 | 0.218  | 0.058 | 0.0005   |
| Clusterin | 0.216  | 0.027 | 1.50E-15 | 0.392  | 0.056 | 1.28E-11 | 0.318  | 0.030 | 2.21E-25 | 0.207  | 0.040 | 5.16E-07 | 0.428  | 0.051 | 7.33E-16 |
| IGFBP3    | 0.235  | 0.026 | 1.28E-18 | 0.141  | 0.053 | 0.012    | 0.272  | 0.036 | 1.82E-13 | 0.350  | 0.046 | 2.30E-13 | 0.159  | 0.059 | 0.015    |
| GP5       | 0.235  | 0.027 | 2.98E-18 | 0.267  | 0.055 | 3.47E-06 | 0.214  | 0.035 | 3.43E-09 | 0.152  | 0.045 | 0.002    | 0.381  | 0.057 | 1.53E-10 |
| CXCL16    | 0.266  | 0.026 | 2.02E-24 | 0.069  | 0.050 | 0.207    | 0.363  | 0.036 | 5.05E-23 | 0.292  | 0.046 | 6.16E-10 | 0.366  | 0.057 | 5.58E-10 |

|               |       |       |            |       |       |           |       |       |           |       |       |           |        |       |           |
|---------------|-------|-------|------------|-------|-------|-----------|-------|-------|-----------|-------|-------|-----------|--------|-------|-----------|
| SRAGE         | 0.281 | 0.026 | 3.73E-27   | 0.326 | 0.051 | 5.52E-10  | 0.354 | 0.037 | 8.03E-21  | 0.438 | 0.046 | 4.14E-20  | 0.252  | 0.058 | 4.04E-05  |
| CD14          | 0.291 | 0.026 | 1.30E-28   | 0.373 | 0.051 | 1.72E-12  | 0.334 | 0.034 | 9.93E-22  | 0.400 | 0.042 | 4.14E-20  | 0.124  | 0.057 | 0.055     |
| SAA1          | 0.314 | 0.024 | 8.46E-37   | 0.282 | 0.049 | 3.10E-08  | 0.288 | 0.032 | 4.93E-18  | 0.330 | 0.040 | 1.23E-15  | 0.411  | 0.053 | 5.60E-14  |
| FBN           | 0.328 | 0.024 | 1.97E-40   | 0.319 | 0.051 | 1.03E-09  | 0.168 | 0.033 | 6.91E-07  | 0.349 | 0.040 | 5.63E-17  | 0.171  | 0.052 | 0.002     |
| FGF23         | 0.353 | 0.027 | 2.29E-39   | 0.519 | 0.054 | 6.14E-21  | 0.252 | 0.035 | 3.09E-12  | 0.296 | 0.045 | 3.21E-10  | 0.388  | 0.058 | 1.71E-10  |
| Resistin      | 0.376 | 0.026 | 1.29E-46   | 0.473 | 0.050 | 3.77E-20  | 0.028 | 0.037 | 0.528     | 0.178 | 0.046 | 0.0003    | 0.352  | 0.058 | 4.64E-09  |
| CRP           | 0.383 | 0.024 | 9.59E-57   | 0.456 | 0.046 | 1.52E-21  | 0.263 | 0.033 | 3.74E-15  | 0.200 | 0.037 | 3.08E-07  | 0.600  | 0.049 | 3.86E-32  |
| ADM           | 0.385 | 0.022 | 2.99E-65   | 0.700 | 0.044 | 4.45E-54  | 0.305 | 0.030 | 1.15E-23  | 0.278 | 0.035 | 2.24E-14  | 0.502  | 0.045 | 1.39E-27  |
| C2            | 0.389 | 0.025 | 5.68E-52   | 0.467 | 0.050 | 5.37E-20  | 0.387 | 0.035 | 1.33E-26  | 0.399 | 0.043 | 1.55E-19  | 0.637  | 0.056 | 7.70E-28  |
| EFEMP1        | 0.409 | 0.022 | 6.34E-74   | 0.241 | 0.045 | 3.10E-07  | 0.284 | 0.031 | 1.35E-19  | 0.365 | 0.038 | 4.14E-20  | 0.310  | 0.049 | 1.79E-09  |
| IGFBP1        | 0.413 | 0.022 | 9.45E-79   | 0.375 | 0.042 | 1.48E-18  | 0.635 | 0.032 | 7.18E-81  | 0.246 | 0.035 | 9.47E-12  | 0.742  | 0.045 | 9.03E-55  |
| KLKB1         | 0.443 | 0.025 | 5.94E-68   | 0.172 | 0.051 | 0.001     | 0.693 | 0.034 | 7.72E-87  | 0.482 | 0.040 | 3.31E-31  | 0.877  | 0.054 | 2.20E-54  |
| IGF1          | 0.451 | 0.024 | 2.85E-77   | 0.505 | 0.045 | 1.83E-27  | 0.355 | 0.033 | 5.54E-25  | 0.447 | 0.041 | 8.00E-26  | -0.048 | 0.051 | 0.406     |
| CNTN1         | 0.455 | 0.025 | 4.04E-72   | 0.645 | 0.049 | 1.74E-37  | 0.536 | 0.034 | 7.71E-53  | 0.638 | 0.042 | 2.78E-48  | 0.295  | 0.054 | 1.79E-07  |
| BNP           | 0.470 | 0.022 | 1.67E-94   | 0.479 | 0.045 | 1.25E-24  | 0.407 | 0.032 | 5.83E-35  | 0.277 | 0.041 | 3.75E-11  | 0.447  | 0.051 | 5.42E-17  |
| Hemopexin     | 0.579 | 0.024 | 3.23E-120  | 0.812 | 0.048 | 3.12E-60  | 0.361 | 0.033 | 9.31E-26  | 0.378 | 0.041 | 2.02E-19  | 0.624  | 0.053 | 2.02E-29  |
| Ceruloplasmin | 0.908 | 0.023 | 1.02E-294  | 1.027 | 0.045 | 9.41E-103 | 0.926 | 0.030 | 6.13E-182 | 0.635 | 0.036 | 6.20E-65  | 1.274  | 0.048 | 1.10E-130 |
| Leptin        | 1.052 | 0.018 | <1.00E-500 | 1.075 | 0.035 | 2.32E-177 | 0.955 | 0.032 | 4.04E-169 | 1.060 | 0.031 | 2.27E-206 | 1.092  | 0.041 | 1.10E-131 |

\*β-coefficient: For women compared to men, 1 standard deviation increase in rank normalized biomarker.

+ β-coefficient: higher in women

-β-coefficient: higher in men

MV model adjusts for age, sex, SBP, HTN treatment, HDL, total cholesterol, BMI, and DM

**Supplemental Table 6. Event Rates, Time to Events, and Follow-up Times for Clinical Outcomes**

| Outcome                | Women<br>(N=3895, follow-up time=12.9 years) |                         |                            | Men<br>(N=3289, follow-up time=12.4 years) |                         |                            |
|------------------------|----------------------------------------------|-------------------------|----------------------------|--------------------------------------------|-------------------------|----------------------------|
|                        | Events <sup>±</sup>                          | Event Rate <sup>¥</sup> | Time to event <sup>§</sup> | Events <sup>±</sup>                        | Event Rate <sup>¥</sup> | Time to event <sup>§</sup> |
| <b>Heart Failure</b>   | 117<br>(3%)                                  | 2.35<br>(1.92, 2.78)    | 9.2 ± 4.5                  | 119<br>(4%)                                | 2.94<br>(2.41, 3.47)    | 9.0 ± 4.6                  |
| <b>All CVD</b>         | 294<br>(8%)                                  | 6.24<br>(5.53, 6.95)    | 7.9 ± 4.5                  | 326<br>(10%)                               | 8.79<br>(7.84, 9.75)    | 7.3 ± 4.4                  |
| <b>CV death</b>        | 65<br>(2%)                                   | 1.29<br>(0.98, 1.61)    | 10.7 ± 3.6                 | 91<br>(3%)                                 | 2.23<br>(1.77, 2.68)    | 9.3 ± 4.8                  |
| <b>All cause death</b> | 381<br>(10%)                                 | 7.59<br>(6.83, 8.35)    | 10.1 ± 4.3                 | 430<br>(13%)                               | 10.52<br>(9.53, 11.51)  | 9.6 ± 4.5                  |
| <b>Non-CV death</b>    | 316<br>(8%)                                  | 6.29<br>(5.60, 6.99)    | 9.6 ± 4.4                  | 339<br>(10%)                               | 8.29<br>(7.41, 9.18)    | 10.0 ± 4.4                 |

<sup>±</sup>Events reported as n/N (%).

<sup>¥</sup>Event rates reported as n/1000 person years.

<sup>§</sup>Time to event reported in years.

Abbreviations: CV = cardiovascular, CVD = cardiovascular disease



**Supplemental Table 7. Sex-specific multivariable-adjusted associations of single biomarkers with cardiovascular outcomes, adjusted for lipid lowering medications**

|                        | Men              |         | Women            |         | p <sub>int</sub> (sex) |
|------------------------|------------------|---------|------------------|---------|------------------------|
|                        | HR (95% CI)      | p-value | HR (95% CI)      | p-value |                        |
| <b>Heart Failure</b>   |                  |         |                  |         |                        |
| CD14                   | 1.36 (1.18-1.56) | 0.002   | 1.56 (1.26-1.93) | 0.001   | 0.009                  |
| ApoB                   | 1.25 (1.02-1.53) | 0.36    | 1.53 (1.14-2.05) | 0.038   | 0.009                  |
| GMP140                 | 0.99 (0.87-1.12) | 0.98    | 1.02 (0.84-1.23) | 0.93    | 0.01                   |
| PON1                   | 0.96 (0.84-1.10) | 0.93    | 0.96 (0.79-1.18) | 0.85    | 0.02                   |
| SRAGE                  | 0.93 (0.82-1.06) | 0.73    | 0.95 (0.79-1.15) | 0.83    | 0.03                   |
| Tetranectin            | 0.98 (0.86-1.11) | 0.96    | 0.90 (0.74-1.09) | 0.58    | 0.04                   |
| <b>All CVD</b>         |                  |         |                  |         |                        |
| GDF15                  | 1.37 (1.13-1.65) | 0.09    | 1.59 (1.30-1.95) | 0.0005  | 0.04                   |
| A1M                    | 0.90 (0.81-1.02) | 0.64    | 1.16 (1.02-1.31) | 0.38    | 0.0008                 |
| CD14                   | 0.99 (0.88-1.12) | 0.92    | 1.27 (1.12-1.45) | 0.012   | 0.003                  |
| SRAGE                  | 1.08 (0.96-1.21) | 0.80    | 0.90 (0.80-1.01) | 0.07    | 0.03                   |
| <b>CV death</b>        |                  |         |                  |         |                        |
| PPBP                   | 0.97 (0.77-1.21) | 0.91    | 0.65 (0.51-0.84) | 0.031   | 0.02                   |
| REG1A                  | 1.06 (0.85-1.32) | 0.85    | 1.58 (1.18-2.14) | 0.035   | 0.03                   |
| TSC22D3                | 0.93 (0.75-1.16) | 0.52    | 1.28 (1.00-1.63) | 0.15    | 0.04                   |
| <b>All cause death</b> |                  |         |                  |         |                        |
| REG1A                  | 1.08 (0.97-1.20) | 0.31    | 1.27 (1.13-1.43) | 0.0008  | 0.03                   |
| CD56                   | 0.95 (0.86-1.04) | 0.45    | 1.10 (0.97-1.25) | 0.25    | 0.25                   |
| Leptin                 | 1.11 (0.96-1.29) | 0.31    | 0.88 (0.77-1.02) | 0.18    | 0.06                   |

HR: hazards ratio per 1-SD increase in rank normalized biomarker

Multivariable model adjusts for age, SBP, HTN treatment, HDL cholesterol, total cholesterol, BMI, DM, smoking, and lipid lowering medications. Abbreviations: HR = hazards ratio, CV = cardiovascular, CVD = cardiovascular disease.

**Supplemental Table 8. Sex-specific multivariable-adjusted associations of single biomarkers with cardiovascular outcomes, adjusted for menopause**

|                        | <b>HR (95% CI)</b> | <b>p-value</b> |
|------------------------|--------------------|----------------|
| <b>Heart Failure</b>   |                    |                |
| CD14                   | 1.60 (1.29-2.00)   | 0.0008         |
| ApoB                   | 1.52 (1.12-2.07)   | 0.041          |
| GMP140                 | 1.03 (0.85-1.26)   | 0.86           |
| PON1                   | 0.96 (0.78-1.17)   | 0.83           |
| SRAGE                  | 0.96 (0.79-1.16)   | 0.83           |
| Tetranectin            | 0.91 (0.74-1.11)   | 0.64           |
| <b>All CVD</b>         |                    |                |
| GDF15                  | 1.58 (1.27-1.98)   | 0.002          |
| A1M                    | 1.17 (1.03-1.34)   | 0.36           |
| CD14                   | 1.36 (1.18-1.56)   | 0.002          |
| SRAGE                  | 0.93 (0.82-1.06)   | 0.73           |
| <b>CV death</b>        |                    |                |
| PPBP                   | 0.57 (0.43-0.76)   | 0.007          |
| REG1A                  | 1.41 (1.03-1.97)   | 0.11           |
| TSC22D3                | 1.26 (0.96-1.64)   | 0.23           |
| <b>All cause death</b> |                    |                |
| REG1A                  | 1.23 (1.09-1.39)   | 0.008          |
| CD56                   | 1.13 (0.99-1.29)   | 0.19           |
| Leptin                 | 0.87 (0.75-1.01)   | 0.18           |

HR: hazards ratio per 1-SD increase in rank normalized biomarker

Multivariable model adjusts for age, SBP, HTN treatment, HDL cholesterol, total cholesterol, BMI, DM, smoking, and lipid lowering medications. Abbreviations: HR = hazards ratio, CV = cardiovascular, CVD = cardiovascular disease.

## Supplemental Figure 1.

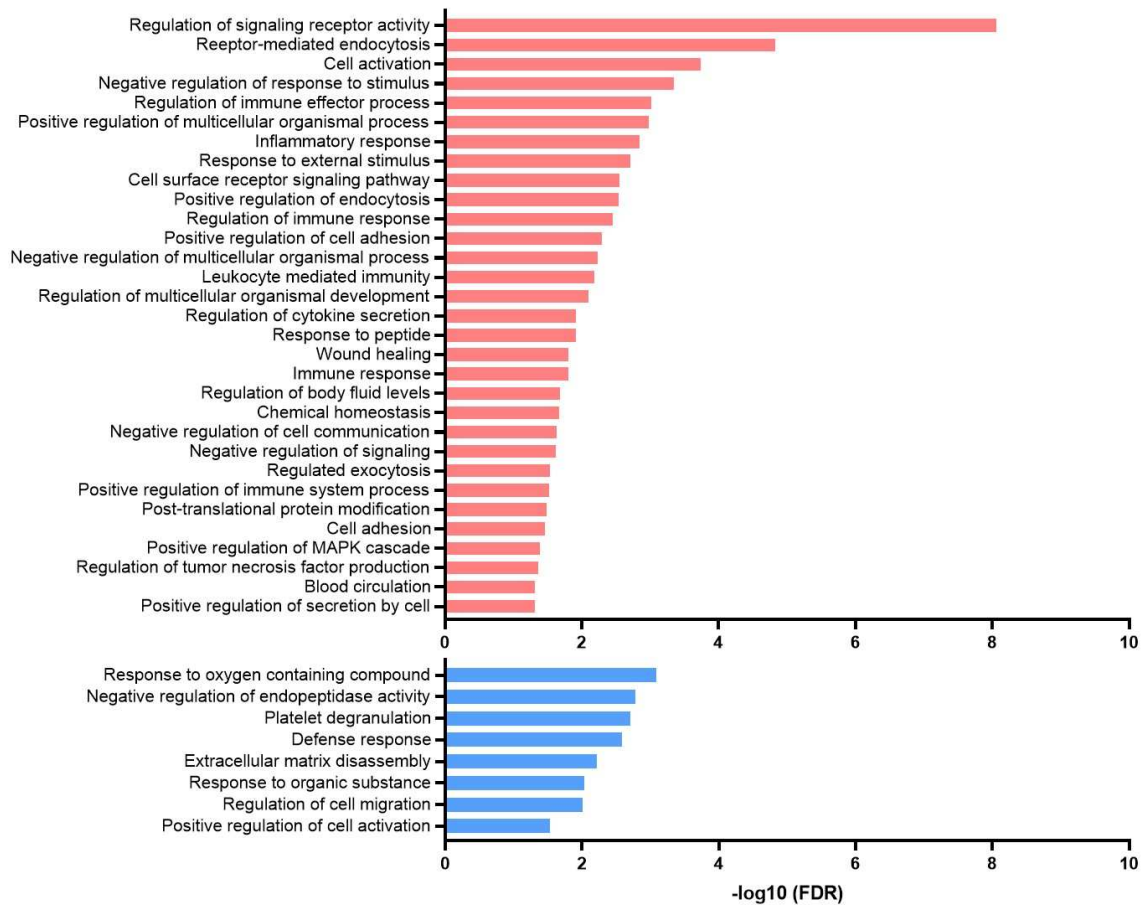

## Supplemental Figure 2.

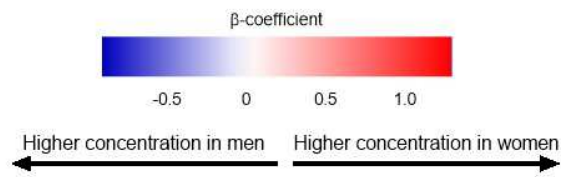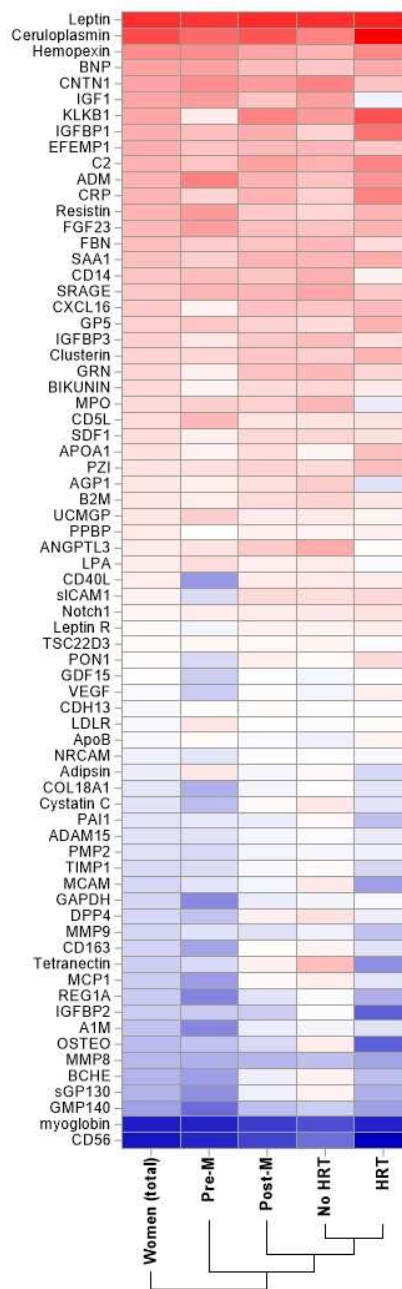

Supplement: NIHMS1536890-supplement-1.pdf [file NIHMS1536890-supplement-1.pdf]
